# Supplementary material
Source: bioRxiv or medRxiv preprint supplement (https://www.biorxiv.org/highwire/filestream/72173/field_highwire_adjunct_files/3/236067-4.pdf)

**A**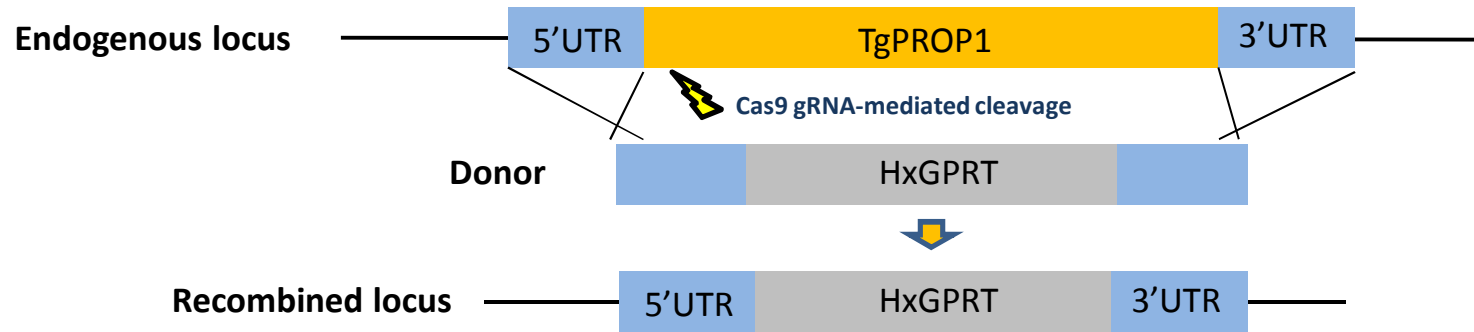**B**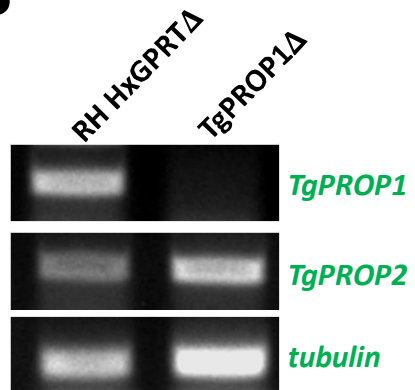

Supplement: Supplementary file [file 236067-4.pdf]
